1           **National trends in suicides and male twin live births in the US, 2003 to 2019:**  
2                   **an updated test of collective optimism and selection *in utero***

3  
4  
5  
6  
7  
8                           Parvati Singh<sup>a</sup>

9                           Samantha Gailey<sup>b</sup>

10                           Abhery Das<sup>c</sup>

11                           Tim A. Bruckner<sup>c,d</sup>

12  
13           <sup>a</sup>Division of Epidemiology, College of Public Health, The Ohio State University

14           <sup>b</sup>Department of Forestry, Michigan State University

15           <sup>c</sup>Program in Public Health, University of California, Irvine

16           <sup>d</sup>Center for Population, Inequality, and Policy, University of California, Irvine

17  
18           **Author contributions:** PS conceived the study, acquired data, conducted data  
19           analyses and developed the manuscript; SG assisted with data acquisition and  
20           manuscript preparation; AD contributed to manuscript preparation and review; TAB  
21           conducted analyses and supervised manuscript development and review.

22           **Conflicts of interest:** All authors declare no conflicts of interest.

33 **Abstract**

34 Prior research based on Swedish data suggests that collective optimism, as measured  
35 by monthly incidence of suicides, correlates inversely with selection *in utero* against male  
36 twins in a population. We test this finding in the US, which reports the highest suicide rate  
37 of all high-income countries, and examine whether monthly changes in overall suicides  
38 precede changes in the ratio of male twin to male singleton live births. Consistent with  
39 prior work, we also examine as a key independent variable, suicides among women aged  
40 15-49 years. We retrieved monthly data on suicides and the ratio of male twin to singleton  
41 live births from CDC WONDER, 2003 to 2019, and applied Box-Jenkins iterative time-  
42 series routines to detect and remove autocorrelation from both series. Results indicate  
43 that a one percent increase in monthly change in overall suicides precedes a 0.005 unit  
44 decline in male twin live births ratio 6 months later (coefficient = -0.005, *P* value = 0.004).  
45 Results remain robust to use of suicides among reproductive-aged women as the  
46 independent variable (coefficient = -0.0012, *P* value = 0.014). Our study lends external  
47 validity to prior research and supports the notion that a decline in collective optimism  
48 corresponds with greater selection *in utero*.

49 **Key words:** collective optimism, suicides, selection *in utero*, male twins, time-series  
50 analysis

## 51 **Introduction**

52 The US reports the highest suicide rate (14 deaths per 100,000 people) among all high-  
53 income countries. Experts attribute this trend to increased national despair, that may  
54 approximate the bleak social and economic outlook experienced by a society on average  
55 1. Not surprisingly, suicides appear to track or correlate positively with some aggregate  
56 indicators of national despair <sup>2-7</sup>.

57 In his seminal treatise on social determinants of suicides, Durkheim (1897) posited that  
58 suicide prevalence in a population is a consequence of the underlying social structure,  
59 beliefs and practices that he referred to as *collective inclination* <sup>8</sup>. A population's *collective*  
60 *inclination* towards suicide may exert coercive pressure on individuals towards suicide  
61 completion and may vary based on social despair during stressful periods <sup>8</sup>. As an  
62 extreme consequence of increased despair, trends in suicides may reflect perturbations  
63 in aggregate sentiments of despair across place and time <sup>6,7,9</sup>. Ecologically, collective  
64 despair or (conversely) optimism may reflect a population's shared outlook <sup>10</sup> and  
65 manifest as contagious, collective expectations about the future <sup>11-14</sup>. Suicides, by  
66 definition, reflect termination of the future. Whereas research on suicides and optimism  
67 largely focuses on individual-level mechanisms, national trends in select measures of  
68 optimism appear to explain (to an extent) spatial and temporal variation in suicides <sup>2-7</sup>.  
69 Collective optimism, however, remains a complex construct that may derive not just from  
70 aggregate economic expectations, but also social integration, cohesion and social capital  
71 <sup>15-19</sup>. Quantification of collective optimism in a manner that accounts for all facets of this  
72 construct remains difficult. However, as suggested by Durkheim, to the extent that  
73 suicides correspond with a society's collective experiences of despair and future outlook,

74 the patterning of suicides in a population may signal periods of acute decline in collective  
75 optimism <sup>8</sup>.

76 Decline in collective optimism may also manifest as risk aversion or reduced willingness  
77 to invest in high-cost, uncertain ventures <sup>20</sup>. Uncertainty and unfavorable expectations  
78 about the future correspond with reduction or postponement of expensive, long-term  
79 investments such as fertility, home purchase or new business creation <sup>15,20,21</sup>.  
80 Childbearing remains one of the most fundamental, long-term investments over the life  
81 course. Substantial research documents reproductive risk-aversion during stressful  
82 ambient circumstances<sup>22</sup> that, in turn, may also correspond with reduced collective  
83 optimism. Parental and social optimism appears to vary inversely with risk aversion, which  
84 spills over into conscious and non-conscious decisions regarding offspring conception,  
85 sex-specific fetal loss and fitness of resulting live births <sup>23,24</sup>.

86 Selection *in utero*, defined as spontaneous abortion of gestations (also referred to  
87 as fetal loss), offers one mechanism through which populations may respond to  
88 heightened uncertainty, or reduced collective optimism. <sup>22</sup>. Selection *in utero* against frail  
89 or risky gestations, by way of increased spontaneous abortion or fetal loss, may indicate  
90 a pregnant person's non-conscious, biological risk-averse response to unfavorable  
91 external circumstances. These unfavorable circumstances may diminish a frail infant's  
92 survival or reproductive success should the pregnancy result in a live birth <sup>24</sup>. Relative to  
93 females, male gestations appear particularly vulnerable to selection *in utero* owing to their  
94 greater demand on maternal caregiving resources but lower likelihood of yielding  
95 grandchildren (i.e. reproductive success) if born in stressful conditions <sup>22,24</sup>. Male twin  
96 gestations, on average, occupy the right tail of the gestational frailty distribution and fare

97 poorer in terms of relative survival, longevity and (future) reproductive success relative to  
98 all other types of gestations<sup>25,26</sup>. Hence, the incidence of male twin live births (or *selection*  
99 *in utero* against male twins) may indicate the extent to which a population is willing to  
100 invest in risky gestations that, in turn, may gauge a population's sensitivity to variations  
101 in collective optimism<sup>13,21,27</sup>

102 Collective optimism may serve as a shared precursor of both (a) increase in  
103 suicides and (2) decline in male twin live births. If a population exhibits risk-aversion  
104 following sudden perturbations in collective optimism, temporal changes in one of the  
105 most acute indicators of despair- suicides- should precede changes in population-level  
106 markers of *selection in utero*, such as the incidence of male twin live births<sup>1,13</sup>. Two recent  
107 studies support this hypothesis. Karasek et al. (2015) report an inverse association  
108 between a measure of consumer confidence index among reproductive aged women  
109 (indicative of macroeconomic climate) and male twin births in Sweden<sup>21</sup>. This research  
110 suggests that women may 'sense' ambient macroeconomic disturbances and, as a risk-  
111 averse response, yield fewer-than-expected male twins in the short-term (two months  
112 following extreme decline in consumer confidence). Catalano et al. (2020) test this  
113 phenomena through the lens of collective optimism and examine the relation between  
114 suicides among 15-49 years old women and male twin births in Sweden<sup>13</sup>. They find an  
115 inverse association between female suicides and male twinning in that greater-than-  
116 expected incidence of suicide among reproductive aged women precedes a decline in  
117 male twin live births by three months<sup>13</sup>. To our knowledge, no other studies that have  
118 examined the relation between collective optimism and male twin live births.

119 Replication and extension of this work to other national contexts may hold interest  
120 among evolutionary theorists, fertility scholars, and epidemiologists. The external validity  
121 of findings from tests of collective optimism in Sweden to other populations remains  
122 unexplored. Sweden differs markedly from the US in terms of healthcare systems, social  
123 safety nets, racial/ethnic diversity and income inequality<sup>31,32</sup>. We examine whether and  
124 to what extent sudden variations in collective optimism, as indicated by monthly changes  
125 in overall suicides, precede changes in the ratio of male twin to male singleton live births  
126 in the US using publicly available, nationally aggregated monthly data from 2003 to 2019.  
127 Consistent with prior work, we also test this relation with suicides among women aged  
128 15-49 years<sup>13,21</sup>.

129

## 130 **Methods**

### 131 **Data**

132 We retrieved data on monthly counts of (1) male twin and singleton live births and  
133 (2) suicides (mortality from intentional self-harm, ICD-10 Codes: X60-X84) from the  
134 Centers for Disease Control and Prevention's online national database- CDC WONDER-  
135 for the period of 2003 to 2019<sup>33-35</sup>. CDC WONDER reports data from the National Center  
136 for Health Statistics' Division of Vital Statistics and provides national, regional and  
137 temporal aggregates by select subgroups (e.g. gender, age) and health conditions<sup>33-35</sup>.  
138 These data are publicly available and are extensively utilized by epidemiologists  
139 worldwide<sup>36</sup>. We selected the time period of January 2003 to December 2019 because  
140 monthly counts of twin births (by sex) for the US are not available in CDC WONDER prior

141 to 2003. We excluded the year 2020 from our analysis to limit confounding by the COVID-  
142 19 pandemic. These restrictions yielded four nationally aggregated data series of 204  
143 months each: (1) male twin live births, (2) male singleton live births, (3) overall suicides  
144 (all ages, all sexes) and (4) suicides among women aged 15-49 years. This study was  
145 deemed exempt from IRB review as we used publicly available, aggregate, de-identified  
146 data.

## 147 **Variables**

148 We defined as our outcome the ratio of male twins to male singleton live births per  
149 month. It is plausible that a general decline in male births may directly reduce the number  
150 of male twin births as well. For this reason, we used the monthly counts of male twin and  
151 male singleton live births to develop a monthly male twin ratio (male twin live births/male  
152 singleton live births) series. Our outcome formulation differs from that of prior research  
153 that utilizes the odds ratio of male twins relative to female twin births<sup>13</sup>. Research on  
154 parental optimism and adaptive mechanisms with respect to sex ratios at birth reports an  
155 inverse, lagged relation between male and female twin live births<sup>23,37</sup>. Put simply, a  
156 decline in live-born male twins may precede an increase in female twin live births (and  
157 vice versa)<sup>37</sup>. We thus contend that the formulation of odds ratio of male twin births, as  
158 utilized by Catalano et al (2020), may distort the temporal lag and/or the magnitude of  
159 observed associations owing to endogenous, inverse relations between the numerator  
160 (odds of male twin births) and denominator (odds of female twin births) of the outcome.

161 As our independent variable we used overall suicides, across all age and sex  
162 groups, per month. Overall suicides gauge several common underlying ambient risk  
163 factors shared across age and sex groups such as economic inequality and access to

164 mental health care. Consistent with prior work, we also examine the robustness of results  
165 to suicides among women aged 15-49 years. This population may show heightened  
166 sensitivity to the social environment <sup>13,21</sup>.

167 We modelled sudden changes in collective optimism (or ‘shocks’) by converting  
168 monthly counts of suicides into percent monthly change in suicides. We subtracted the  
169 observed count of suicides in the previous month ( $x_{m-1}$ ) from those in a given month ( $x_m$ )  
170 and divided this difference by the previous month’s observation (i.e.  $[x_m - x_{m-1}]/x_{m-1}$ ). This  
171 transformation offers the dual advantage of (1) centering around zero the strong, upward  
172 trend in suicides in the US documented in prior research <sup>38</sup> and (2) yielding sudden  
173 variations (i.e. volatility rather than levels) depending on whether suicides increased  
174 (positive) or decreased (negative) relative to the previous month. Prior research  
175 examining population-level impact of ecological stressors on perinatal and psychiatric  
176 outcomes similarly uses change scores when gauging ambient ‘shocks’ <sup>39,40</sup>.

## 177 **Analysis**

178 We aim to test whether greater-than-expected change in monthly incidence of  
179 overall suicides in the US precedes a reduction in male twins born in the population. We  
180 also test this relation with respect to suicides among women aged 15-49 years. Our  
181 outcome series, however, may exhibit temporal patterns such as seasonality, trends, and  
182 persistence of “memory” from a preceding month into following months. Because of this  
183 patterning, also known as autocorrelation, the expected value of the outcome variable (in  
184 a given month) may not equal the mean of past values <sup>41,42</sup>. This circumstance violates  
185 the assumptions of correlational tests <sup>41,42</sup>. Analysis of autocorrelated data, in such cases,  
186 may yield spurious relations between the exposure and outcome owing to non-



187 independence of outcome observations (violation of the i.i.d. assumption) and non-zero  
188 mean of residuals <sup>41,42</sup>.

189 We controlled for autocorrelation by modeling the expected value of the outcome  
190 series as a function of its past values. We performed this modeling using Autoregressive,  
191 Integrated Moving Average (ARIMA) time-series approach wherein we applied iterative  
192 pattern recognition routines developed by Box & Jenkins (2015) to detect autocorrelation  
193 parameters and control for them in our analysis <sup>43</sup>. Epidemiologists routinely use ARIMA  
194 time-series analytic methods in longitudinal research on the relation between ambient  
195 stressors and birth outcomes <sup>13,21,37</sup>. Identification of autocorrelation parameters allows  
196 for prediction of counterfactuals—that is, the monthly series of male twin ratio based  
197 solely on its inherent patterns, in the absence of potential perturbations induced by  
198 changes in the exposure variable. This counterfactual series thus contains expected  
199 values of the outcome under the null hypothesis <sup>41–43</sup>. Removal of autocorrelation in the  
200 outcome also yields normally distributed residuals with a mean of zero <sup>41–43</sup>.

201 We conducted ARIMA analysis using software from Scientific Computing Associates  
202 (SCA) <sup>44</sup>. Our analytic steps appear below:

- 203 1. We used Box-Jenkins time-series methods to identify and remove autocorrelation  
204 in the monthly series of male twin ratio <sup>43</sup>.
- 205 2. We applied the Box-Jenkins routines to identify and remove autocorrelation in the  
206 percent monthly change in overall suicides series <sup>43</sup>. This exercise yielded  
207 exposure residuals that align with the classic correlational test, dating back to  
208 Fisher, wherein the residuals indicate deviation from expected values of the series,

209 net of autocorrelation <sup>45</sup>. We defined this residualized series as our exposure or  
210 independent variable.

211 3. We applied the exposure residuals obtained in step 2 to the ARIMA model devised  
212 in step 1. We specified exposure lags of 2, 3, 4, 5, 6 months based on prior work,  
213 the average gestational age of live-born male twins in the US (~34 to 37 weeks)  
214 <sup>34</sup>, and the hypothesized gestational ages at which male twins *in utero* appear  
215 sensitive to ambient stress <sup>13,21</sup>.

216 4. We inspected the residuals obtained from the time-series model in step 3 for  
217 autocorrelation. If any were found, we inserted relevant ARIMA parameters into  
218 the error term.

219 5. We conducted a sensitivity test by repeating step 3 using log transformed (natural  
220 logarithm) male twin ratio series as the outcome to gauge whether results from  
221 step 3 were sensitive to heteroskedastic variance and influential outliers.

222 6. As a robustness check of whether our findings align with prior research, we  
223 repeated steps 2 and 3 with de-trended residuals of percent monthly change in  
224 suicides among females aged 15-49 years as the exposure.

## 225 **Results**

226  
227 Table 1 presents the descriptive statistics of our analytic data. The 204 months in  
228 our time-series analysis yielded a total of 1,129,712 male twins and 33,850,336 male  
229 singleton births. Total number of overall suicides over our study period equaled 670,893,  
230 with 73,826 suicides among females aged 15-49 years. There were approximately 5,538  
231 male twin births per month (standard deviation = 327.08) and male twin ratio per month

232 averaged 0.0334 (standard deviation = 0.001). Percent monthly change in overall  
233 suicides averaged 0.0045 (standard deviation = 0.071) and among females aged 15-49  
234 years, averaged 0.0075 (standard deviation = 0.107).

235 **Table 1: Counts and distribution of male twin live births, male singleton live**  
236 **births, male twin ratio, overall suicides and suicides among females aged 15 to 49**  
237 **years in the US, from 2003 to 2019.**

238

239 Figure 1 plots the monthly male twin ratio from January 2003 to December 2019.  
240 We observe a slight increase in this ratio starting in 2009 that persists through 2019  
241 (Figure 1).

242 **Figure 1: Plot of monthly male twin ratio (male twin live births/male singleton live**  
243 **births) in the US, from January 2003 to December 2019.**

244

245 Figure 2 presents the percent monthly change in overall suicides. As expected  
246 from our transformation of monthly suicide counts into percent monthly change, this series  
247 centers around zero but shows seasonal peaks and troughs (Figure 2).

248 **Figure 2: Plot of percent monthly change in overall suicides in the US, from**  
249 **January 2003 to December 2019.**

250

251 The plot of percent monthly change in female suicides (aged 15-49 years) appears  
252 in Supplement Figure 1.

253 Box-Jenkins routines identified autoregression (i.e. long-term retention or 'echoes'  
254 of observations) in the monthly series of male twin ratios at lags 1 and 12 months (AR 1,  
255 12). Figure 3a plots the residuals of monthly male twin ratios after removal of AR 1, 12

256 from the original series and represents the counterfactual. Application of Box-Jenkins  
257 ARIMA routines to percent monthly change in overall suicides detected two moving  
258 average parameters at lags 1 and 12 indicating high or low values of residual errors being  
259 remembered at 1 and 12 months later. We also detected an integration parameter that  
260 required differencing of the percent monthly change in overall suicides series over the  
261 previous 12 months (I 12). Figure 3b plots the de-trended series of percent monthly  
262 change in suicides after removal of detected autocorrelation parameters (MA 1, 12; I 12).  
263 This series exhibits no temporal pattern and serves as the exposure or independent  
264 variable of our test (Figure 3b).

265 **Figure 3: Residual series (after removal of autocorrelation) of (i) monthly male**  
266 **twin ratios (Figure 3a) and (ii) percent monthly change in overall suicides (Figure**  
267 **3b), from January 2003 to December 2019, USA. Initial 12 observations lost to**  
268 **autocorrelation parameter modelling.**

269

270 Table 2 shows the estimated coefficients for our time-series test model  
271 (corresponding to analytic step 3).

272 **Table 2: Time-Series results for monthly male twin ratios from January 2003 to**  
273 **December 2019, as a function of exposure to de-trended residuals of percent**  
274 **monthly change in overall suicides and autocorrelation parameters.**

275

276 A 1 percent increase in overall suicides corresponds with a 0.005 unit decline in  
277 male twin ratio 6 months later ( $p= 0.004$ ). Put another way, a one percent increase in  
278 overall suicides in a month (relative to the previous month) precedes a decline in 5 male  
279 twin live births per 1,000 male singleton live births 6 months later. This translates to a  
280 15% decline in the average incidence of male twin births per 1000 male singleton live

281 births (based on 33.4 average monthly male twin births per 1000 male singleton births in  
282 our sample;  $5/33.4=15$ ). Examination of residuals indicates absence of autocorrelation  
283 (Supplement Figure 2). Sensitivity tests support our original inference in that log-  
284 transformed series of monthly male twin ratio exhibits similar relation to de-trended  
285 residuals of percent monthly change in overall suicides at exposure lag of 6 months  
286 (coefficient = -0.137,  $p = 0.004$ ) (Table 3).

287 **Table 3: Time-Series results for log-transformed monthly male twin ratios from**  
288 **January 2003 to December 2019, as a function of exposure to de-trended**  
289 **residuals of percent monthly change in overall suicides and autocorrelation**  
290 **parameters.**

291

292 As a robustness check and to maintain comparability with prior work, we repeated  
293 our main test (from Table 2) with de-trended residuals of percent monthly change in  
294 female suicides (aged 15-49 years) as our exposure (Supplement Figure 3). Results from  
295 this robustness check support our main results in terms of exposure lag and statistically  
296 detectable decline in male twin ratio (Supplement Table 1). However, the relation between  
297 the outcome and exposure at lag 6 appears attenuated in magnitude (coefficient = -  
298 0.0012,  $p = 0.014$ ) suggesting a stronger relation between male twinning and changes in  
299 overall suicides, relative to male twinning and suicides among reproductive-aged females  
300 in the US (Supplement Table 1).

301

## 302 **Discussion**

303 Volatility in collective optimism, or (conversely) collective despair, as indicated by  
304 national frequency of suicides, may precede *selection in utero* in a population<sup>13,21</sup>. Prior

305 evidence from Sweden reports the presence of this relation with respect to extreme  
306 variations in female consumer confidence <sup>21</sup> and suicides among women aged 15-49  
307 years <sup>13</sup>. We extended this work to the US population and tested whether monthly  
308 changes in overall suicides predict changes in the ratio of male twin to male singleton live  
309 births—one sensitive indicator of *selection in utero*. Time-series test results indicate a  
310 0.5% decline in male twinning per 1000 live-born male singletons, 6 months following an  
311 increase in overall suicides. We also observe a similar, albeit attenuated, relation between  
312 male twin live births and percent monthly change in suicides among 15-49 years old  
313 women. Our results align with prior work <sup>13,21</sup> and suggest that the temporal patterning of  
314 suicides may correspond with male twin live births, which in aggregate may indicate a  
315 biological risk-averse response to volatility in collective optimism across varied  
316 populations.

317 Strengths of our study include the use of rigorous time-series modelling  
318 approaches that limit confounding from shared patterning (e.g. seasonality) across male  
319 twin births and suicides. In addition, we measure the residual series of percent monthly  
320 change in suicides in order to capture sudden perturbations (net of autocorrelation). This  
321 approach, we argue, provides a more valid test of *selection in utero* following acute  
322 changes in collective optimism, relative to observed monthly suicide counts. We also  
323 overcome a potential limitation of prior work by excluding female twin births from our  
324 outcome formulation <sup>13</sup>. Rather, we examine the ratio of male twins to male singleton live  
325 births. In addition, our use of publicly available data from CDC WONDER allows  
326 independent replication and verification.

327           Moreover, we show that the theory of collective optimism may not only apply to  
328 suicides among reproductive-aged females <sup>13</sup>, but to overall suicides in the US. The  
329 implications of this extension appear two-fold. First, our results suggest that male, in  
330 addition to female, suicides provide a sensitive gauge of collective optimism. Second,  
331 given that Catalano et al. (2020) used as a proxy for collective optimism suicides among  
332 females of child-bearing age – the only population in whom selection *in utero* operates –  
333 it remains possible that pregnant women (and, by extension, male twin live births)  
334 respond not to collective optimism but rather exposure to despair among one’s own  
335 sociodemographic group. The inverse relation we observe between male twin live births  
336 and suicide in males and females of all ages, in contrast, suggests that the mechanism  
337 by which humans signal the need for, and share optimism, appears more fundamental.  
338 Future work that tests the concordance of suicides to male twin births by age, sex, and  
339 racial/ethnic groups (e.g., the sensitivity of Black male twin births to suicides among Black  
340 women) can advance this hypothesis.

341           Limitations include that, as with most observational studies, we cannot eliminate  
342 the possibility of confounding from unobserved factors. Such a factor would (1) not exhibit  
343 any correlation with national trends in collective optimism, (2) exhibit simultaneous  
344 correlation with monthly changes in suicides and monthly male twin ratios at 6-month lag,  
345 and (3) exhibit orthogonality to seasonal patterning in suicides and male twin ratios.  
346 Whereas several phenomena such as economic recessions, political unrest, foreign or  
347 domestic terrorism and disease outbreaks may correspond with heightened *selection in*  
348 *utero* <sup>28–30</sup> and contemporaneously increase the incidence of suicide <sup>46</sup>, we contend that  
349 such factors would also manifest as increased collective despair or diminished optimism.

350 Similar to prior work <sup>13</sup>, another limitation of our study is that we do not distinguish  
351 between monozygotic versus dizygotic twins owing to non-reporting of this information in  
352 data provided by CDC WONDER. In addition, we cannot comment on whether collective  
353 optimism may correspond with increased incidence of vanishing twins (*in utero* absorption  
354 of a fetus by its twin, resulting in singleton live birth) <sup>47</sup>, but we encourage future research  
355 to examine these relations when the appropriate population-level data become available.  
356 We also caution readers that the present study is strictly correlational in that we do not  
357 propose a causal link between increase in suicides and decline in male twinning. Our  
358 study, rather, suggests that ecological stressors that increase collective despair may  
359 extend beyond immediate effects on population-level psychiatric outcomes, into perinatal  
360 outcomes as well.

361 ‘Deaths of despair’ comprise suicide, drug overdose, and alcohol use-related  
362 mortality <sup>1</sup>. Although our study analyzed suicide, investigation into drug and alcohol  
363 related deaths may enhance the theoretical context of collective optimism<sup>1</sup>. Monthly  
364 incidence of psychiatric emergencies for mood and anxiety disorders and suicidal  
365 ideation/self-harm may also serve as measures of national mood. These indicators exhibit  
366 substantial variations across different regions in the US <sup>48,49</sup>, which may allow future  
367 research to conduct a detailed analysis of sub-national relations between regional  
368 optimism and male twin births in the US.

369 In addition to measures of psychiatric morbidity and mortality, indicators of risk-  
370 averse behavior may also serve as useful exposures for further tests of collective  
371 optimism <sup>21</sup>. Analogous to Karasek et al (2015) who utilize a Swedish consumer  
372 confidence index to gauge risk aversion, surrogate measures such as new home



373 ownership, home values and purchase of durable assets (e.g. automobiles) may reflect  
374 social optimism and willingness to invest in the future <sup>21</sup>. Literature on one of the most  
375 widely studied ambient stressors- economic recessions- indicates that decline in  
376 consumption of sinful goods (alcohol, tobacco) and reduction in motor vehicular accidents  
377 may indicate increased risk aversion in a population <sup>50,51</sup>. This literature also reports  
378 decline in fertility as a potential risk-averse response to macroeconomic uncertainty <sup>52,53</sup>.  
379 We encourage future research to examine the relation between these proxy measures of  
380 collective optimism and *selection in utero* with respect to male twinning in the US.

381 Darwinian expectations from *selection in utero* would suggest that males born  
382 among cohorts with lower-than-expected male twin live births exhibit stronger survival  
383 characteristics <sup>24</sup>. To explore potential changes in cohort fitness, re-tests of collective  
384 optimism and *selection in utero* may include examination of preterm births and early  
385 neonatal deaths among males <sup>54</sup>, male-specific infant mortality <sup>55</sup>, birth defects among  
386 live-born males <sup>56</sup>, and incidence of other genetic conditions such as childhood cancers  
387 <sup>57</sup> among conception cohorts exposed *in utero* to greater-than-expected suicides <sup>22</sup>. We  
388 expect these analyses to provide evidence of whether changes in collective optimism  
389 affect the survival characteristics of live-born cohorts, or if their relation to *selection in*  
390 *utero* against male twins diminishes beyond parturition.

391

392

393

394

395

396

## References

1. Case A, Deaton A. *Deaths of Despair and the Future of Capitalism*. Princeton University Press; 2020.
2. Phillips JA, Nugent CN. Suicide and the Great Recession of 2007–2009: The role of economic factors in the 50 US states. *Soc Sci Med*. 2014;116:22-31.
3. Heilbron N, Franklin JC, Guerry JD, Prinstein MJ. Social and ecological approaches to understanding suicidal behaviors and nonsuicidal self-injury. Published online 2014.
4. Collins A, Cox A, Kizys R, Haynes F, Machin S, Sampson B. Suicide, sentiment and crisis. *Soc Sci J*. 2021;58(2):206-223.
5. Agrawal P, Waggle D, Sandweiss DH. Suicides as a response to adverse market sentiment (1980-2016). *PLoS One*. 2017;12(11):e0186913.
6. Won H-H, Myung W, Song G-Y, et al. Predicting national suicide numbers with social media data. *PLoS One*. 2013;8(4):e61809.
7. Lee KS, Lee H, Myung W, et al. Advanced daily prediction model for national suicide numbers with social media data. *Psychiatry Investig*. 2018;15(4):344.
8. Durkheim E. *Suicide: A Study in Sociology*. Routledge; 2005.
9. Larsen ME, Boonstra TW, Batterham PJ, O’Dea B, Paris C, Christensen H. We feel: mapping emotion on Twitter. *IEEE J Biomed Heal informatics*. 2015;19(4):1246-1252.
10. Carver CS, Scheier MF, Segerstrom SC. Optimism. *Clin Psychol Rev*. 2010;30(7):879-889.
11. Herzberg PY, Glaesmer H, Hoyer J. Separating optimism and pessimism: a robust psychometric analysis of the revised Life Orientation Test (LOT-R). *Psychol Assess*. 2006;18(4):433.
12. Hooker K, Monahan D, Shifren K, Hutchinson C. Mental and physical health of spouse caregivers: The role of personality. *Psychol Aging*. 1992;7(3):367.
13. Catalano RA, Goldman-Mellor S, Karasek DA, et al. Collective Optimism and Selection Against Male Twins in Utero. *Twin Res Hum Genet*. 2020;23(1):45-50.
14. Bennett O. Cultures of optimism. *Cult Sociol*. 2011;5(2):301-320.
15. Anglin AH, McKenny AF, Short JC. The impact of collective optimism on new venture creation and growth: A social contagion perspective. *Entrep Theory Pract*. 2018;42(3):390-425.
16. Gómez CA, Kleinman D V, Pronk N, et al. Practice Full Report: Addressing Health Equity and Social Determinants of Health Through Healthy People 2030. *J Public Heal Manag Pract*. 2021;27(6):S249.
17. Olson KR. A literature review of social mood. *J Behav Financ*. 2006;7(4):193-203.

18. Stack S. Suicide: a 15-year review of the sociological literature part I: cultural and economic factors. *Suicide Life-Threatening Behav.* 2000;30(2):145-162.
19. Stack S. Suicide: a 15-year review of the sociological literature part II: modernization and social integration perspectives. *Suicide Life-Threatening Behav.* 2000;30(2):163-176.
20. Puri M, Robinson DT. Optimism and economic choice. *J financ econ.* 2007;86(1):71-99.
21. Karasek D, Goodman J, Gemmill A, et al. Twins less frequent than expected among male births in risk averse populations. *Twin Res Hum Genet.* 2015;18(3):314-320.
22. Bruckner TA, Catalano R. Selection in utero and population health: theory and typology of research. *SSM-population Heal.* 2018;5:101-113.
23. Forbes LS, Mock DW. Parental optimism and progeny choice: when is screening for offspring quality affordable. *J Theor Biol.* 1998;192(1):3-14.
24. Trivers RL, Willard DE. Natural selection of parental ability to vary the sex ratio of offspring. *Science (80- ).* 1973;179(4068):90-92.
25. Lummaa V, Haukioja E, Lemmetyinen R, Pikkola M. Natural selection on human twinning. *Nature.* 1998;394(6693):533-534.
26. Bolund E, Lummaa V, Smith KR, Hanson HA, Maklakov AA. Reduced costs of reproduction in females mediate a shift from a male-biased to a female-biased lifespan in humans. *Sci Rep.* 2016;6(1):1-9.
27. Catalano RA, Saxton KB, Gemmill A, Hartig T. Twinning in Norway following the Oslo Massacre: evidence of a 'Bruce effect' in humans. *Twin Res Hum Genet.* 2016;19(5):485-491.
28. Catalano R, Zilko CEM, Saxton KB, Bruckner T. Selection in utero: a biological response to mass layoffs. *Am J Hum Biol.* 2010;22(3):396-400.
29. Bruckner TA, Catalano R, Ahern J. Male fetal loss in the US following the terrorist attacks of September 11, 2001. *BMC Public Health.* 2010;10(1):1-6.
30. Gemmill A, Casey JA, Catalano R, Karasek D, Margerison CE, Bruckner T. Changes in preterm birth and caesarean deliveries in the United States during the SARS-CoV-2 pandemic. *Paediatr Perinat Epidemiol.* 2021;n/a(n/a). doi:<https://doi.org/10.1111/ppe.12811>
31. Shea D, Davey A, Femia EE, et al. Exploring assistance in Sweden and the United States. *Gerontologist.* 2003;43(5):712-721.
32. Starfield B. Is US health really the best in the world? *Jama.* 2000;284(4):483-485.
33. United States Department of Health and Human Services (US DHHS), Centers for Disease Control and Prevention (CDC), National Center for Health Statistics (NCHS), Division of Vital Statistics. Natality public-use data 2003-2006, on CDC

- WONDER Online Database. CDC WONDER. Published 2009. Accessed May 27, 2021. <http://wonder.cdc.gov/natality-v2006.html>
34. United States Department of Health and Human Services (US DHHS), Centers for Disease Control and Prevention (CDC), National Center for Health Statistics (NCHS), Division of Vital Statistics. Natality public-use data 2007-2019, on CDC WONDER Online Database. CDC WONDER. Published 2020. Accessed May 27, 2021. <http://wonder.cdc.gov/natality-current.html>
  35. Centers for Disease Control and Prevention, National Center for Health Statistics. Underlying Cause of Death 1999-2019 on CDC WONDER Online Database, released in 2020. CDC WONDER. Published 2020. Accessed May 27, 2021. <http://wonder.cdc.gov/ucd-icd10.html>
  36. Friede A, Reid JA, Ory HW. CDC WONDER: a comprehensive on-line public health information system of the Centers for Disease Control and Prevention. *Am J Public Health*. 1993;83(9):1289-1294.
  37. Catalano RA, Saxton K, Bruckner T, Goldman S, Anderson E. A sex-specific test of selection in utero. *J Theor Biol*. 2009;257(3):475-479.
  38. Curtin SC. Age-adjusted suicide rates, by sex and three most common methods-United States, 2000-2018. *MMWR Morb Mortal Wkly Rep*. 2020;69(9):249.
  39. Bruckner TA. Metropolitan economic decline and infant mortality due to unintentional injury. *Accid Anal Prev*. 2008;40(6):1797-1803.
  40. Singh P. Psychiatric Emergencies Following the 2008 Economic Recession: An Ecological Examination of Population-Level Responses in Four US States. *J Ment Health Policy Econ*. 2021;24(1):13-30.
  41. Catalano R, Serxner S. Time series designs of potential interest to epidemiologists. *Am J Epidemiol*. 1987;126(4):724-731.
  42. Shumway RH, Stoffer DS, Stoffer DS. *Time Series Analysis and Its Applications*. Vol 3. Springer; 2000.
  43. Box GEP, Jenkins GM, Reinsel GC, Ljung GM. *Time Series Analysis: Forecasting and Control*. John Wiley & Sons; 2015.
  44. Liu L-M, Hudak GB, Box GEP, Muller ME, Tiao GC. *Forecasting and Time Series Analysis Using the SCA Statistical System*. Vol 1. Scientific Computing Associates DeKalb, IL; 1992.
  45. Fisher RA. Statistical methods for research workers. In: *Breakthroughs in Statistics*. Springer; 1992:66-70.
  46. Reeves A, Stuckler D, McKee M, Gunnell D, Chang S-S, Basu S. Increase in state suicide rates in the USA during economic recession. *Lancet*. 2012;380(9856):1813-1814.
  47. Landy HJ, Keith LG. The vanishing twin: a review. *Hum Reprod Update*.

- 1998;4(2):177-183.
48. Weiss AJ, Barrett ML, Heslin KC, Stocks C. Trends in emergency department visits involving mental and substance use disorders, 2006–2013: statistical brief# 216. Published online 2017.
  49. Owens PL, Fingar KR, Heslin KC, Mutter R, Booth CL. Emergency department visits related to suicidal ideation, 2006–2013: statistical brief# 220. Published online 2017.
  50. Ruhm CJ. Are recessions good for your health? *Q J Econ*. 2000;115(2):617-650.
  51. Ruhm CJ, Black WE. Does drinking really decrease in bad times? *J Health Econ*. 2002;21(4):659-678.
  52. Schneider D. The great recession, fertility, and uncertainty: Evidence from the United States. *J Marriage Fam*. 2015;77(5):1144-1156.
  53. Schneider D, Hastings OP. Socioeconomic variation in the effect of economic conditions on marriage and nonmarital fertility in the United States: Evidence from the Great Recession. *Demography*. 2015;52(6):1893-1915.
  54. Bruckner TA, Gailey S, Das A, et al. Stillbirth as left truncation for early neonatal death in California, 1989–2015: a time-series study. *BMC Pregnancy Childbirth*. 2021;21(1):1-9.
  55. Bruckner TA, Helle S, Bolund E, Lummaa V. Culled males, infant mortality and reproductive success in a pre-industrial Finnish population. *Proc R Soc B Biol Sci*. 2015;282(1799):20140835.
  56. Singh P, Yang W, Shaw GM, Catalano R, Bruckner TA. Selected birth defects among males following the United States terrorist attacks of 11 September 2001. *Birth defects Res*. 2017;109(16):1277-1283.
  57. Bruckner TA, Catalano R, Das A, Lu Y. Cohort Selection In Utero against Male Twins and Childhood Cancers: A Population-Based Register Study. *Cancer Epidemiol Prev Biomarkers*. Published online 2021.

Table 1: Counts and distribution of male twin live births, male singleton live births, male twin ratio, overall suicides and suicides among females aged 15 to 49 years in the US, from 2003 to 2019.

| Variables                                                                                   | Descriptive statistics |
|---------------------------------------------------------------------------------------------|------------------------|
| Total number of male twin live births                                                       | 1,129,712              |
| Total number of male singleton live births                                                  | 33,850,336             |
| Mean monthly count of male twin live births (Standard deviation)                            | 5537.81 (327.08)       |
| Mean monthly male twins ratio (Standard deviation)                                          | 0.0334 (0.001)         |
| Total number of overall suicides                                                            | 670,893                |
| Mean percent monthly change in overall suicides (Standard deviation)                        | 0.0045 (0.071)         |
| Total number of suicides among females aged 15-49 years                                     | 73,826                 |
| Mean percent monthly change in suicides among females aged 15-49 years (Standard deviation) | 0.0075 (0.107)         |

Figure 1: Plot of monthly male twin ratio (male twin live births/male singleton live births) in the US, from January 2003 to December 2019.

Figure 2: Plot of percent monthly change in overall suicides in the US, from January 2003 to December 2019.



Figure 3: Residual series (after removal of autocorrelation) of (i) monthly male twin ratios (Figure 3a) and (ii) percent monthly change in overall suicides (Figure 3b), from January 2003 to December 2019, USA. Initial 12 observations lost to autocorrelation parameter modelling.

Table 2: Time-Series results for monthly male twin ratios from January 2003 to December 2019, as a function of exposure to de-trended residuals of percent monthly change in overall suicides and autocorrelation parameters.

| Variable                                                                          | Coefficient | Standard Error |
|-----------------------------------------------------------------------------------|-------------|----------------|
| Constant                                                                          | 0.034       | 0.000***       |
| Autoregressive parameter: AR 1                                                    | 0.210       | 0.076**        |
| Autoregressive parameter: AR 12                                                   | 0.666       | 0.058***       |
| Differencing                                                                      | None        |                |
| Exposure lag (de-trended residuals of percent monthly change in overall suicides) |             |                |
|                                                                                   | 2           | 0.002          |
|                                                                                   | 3           | 0.000          |
|                                                                                   | 4           | 0.001          |
|                                                                                   | 5           | 0.000          |
|                                                                                   | 6           | -0.005         |
|                                                                                   |             | 0.002**        |

\*p < 0.05; two-sided test.

\*\*p < 0.01; two-sided test.

\*\*\*p < 0.001; two-sided test.

Table 3: Time-Series results for log-transformed monthly male twin ratios from January 2003 to December 2019, as a function of exposure to de-trended residuals of percent monthly change in overall suicides and autocorrelation parameters.

| Variable                                                                          | Coefficient | Standard Error |
|-----------------------------------------------------------------------------------|-------------|----------------|
| Constant                                                                          | -3.394      | 0.007***       |
| Autoregressive parameter: AR 1                                                    | 0.211       | 0.076**        |
| Autoregressive parameter: AR 12                                                   | 0.670       | 0.057***       |
| Differencing                                                                      | None        |                |
| Exposure lag (de-trended residuals of percent monthly change in overall suicides) |             |                |
|                                                                                   | 2           | 0.041          |
|                                                                                   | 3           | 0.008          |
|                                                                                   | 4           | 0.014          |
|                                                                                   | 5           | 0.006          |
|                                                                                   | 6           | -0.137         |
|                                                                                   |             | 0.047          |
|                                                                                   |             | 0.047          |
|                                                                                   |             | 0.047          |
|                                                                                   |             | 0.047          |
|                                                                                   |             | 0.046**        |

\*p < 0.05; two-sided test.

\*\*p < 0.01; two-sided test.

\*\*\*p < 0.001; two-sided test.

Supplement Figure 1: Plot of percent monthly change in suicides among females aged 15-49 years in the US, from January 2003 to December 2019.

Supplement Figure 2: Plot of autocorrelation function (ACF) up to 12 month lags of monthly male twin ratio after specifying autoregressive parameters at lags 1 and 12 (AR 1, 12).

Supplement Figure 3: Residual series (after removal of autocorrelation) of percent monthly change in suicides among women aged 15-49 years, from January 2003 to December 2019, in the US. Initial 12 observations consumed in autocorrelation parameter modelling.

Supplement Table 1: Time-Series results for monthly male twin ratios from January 2003 to December 2019, as a function of exposure to de-trended residuals of percent monthly change in suicides among females aged 15-49 years and autocorrelation parameters.

| Variable                                                                                                 | Coefficient | Standard Error |
|----------------------------------------------------------------------------------------------------------|-------------|----------------|
| Constant                                                                                                 | 0.034       | 0.000***       |
| Autoregressive parameter: AR 1                                                                           | 0.076       | 0.077          |
| Autoregressive parameter: AR 12                                                                          | 0.688       | 0.052***       |
| Differencing                                                                                             | None        |                |
| Exposure lag (de-trended residuals of percent monthly change in suicides among females aged 15-49 years) |             |                |
|                                                                                                          | 2           | 0.0000         |
|                                                                                                          | 3           | 0.0000         |
|                                                                                                          | 4           | 0.0002         |
|                                                                                                          | 5           | -0.0001        |
|                                                                                                          | 6           | -0.0012        |
|                                                                                                          |             | 0.0005*        |

\*p < 0.05; two-sided test.

\*\*p < 0.01; two-sided test.

\*\*\*p < 0.001; two-sided test.





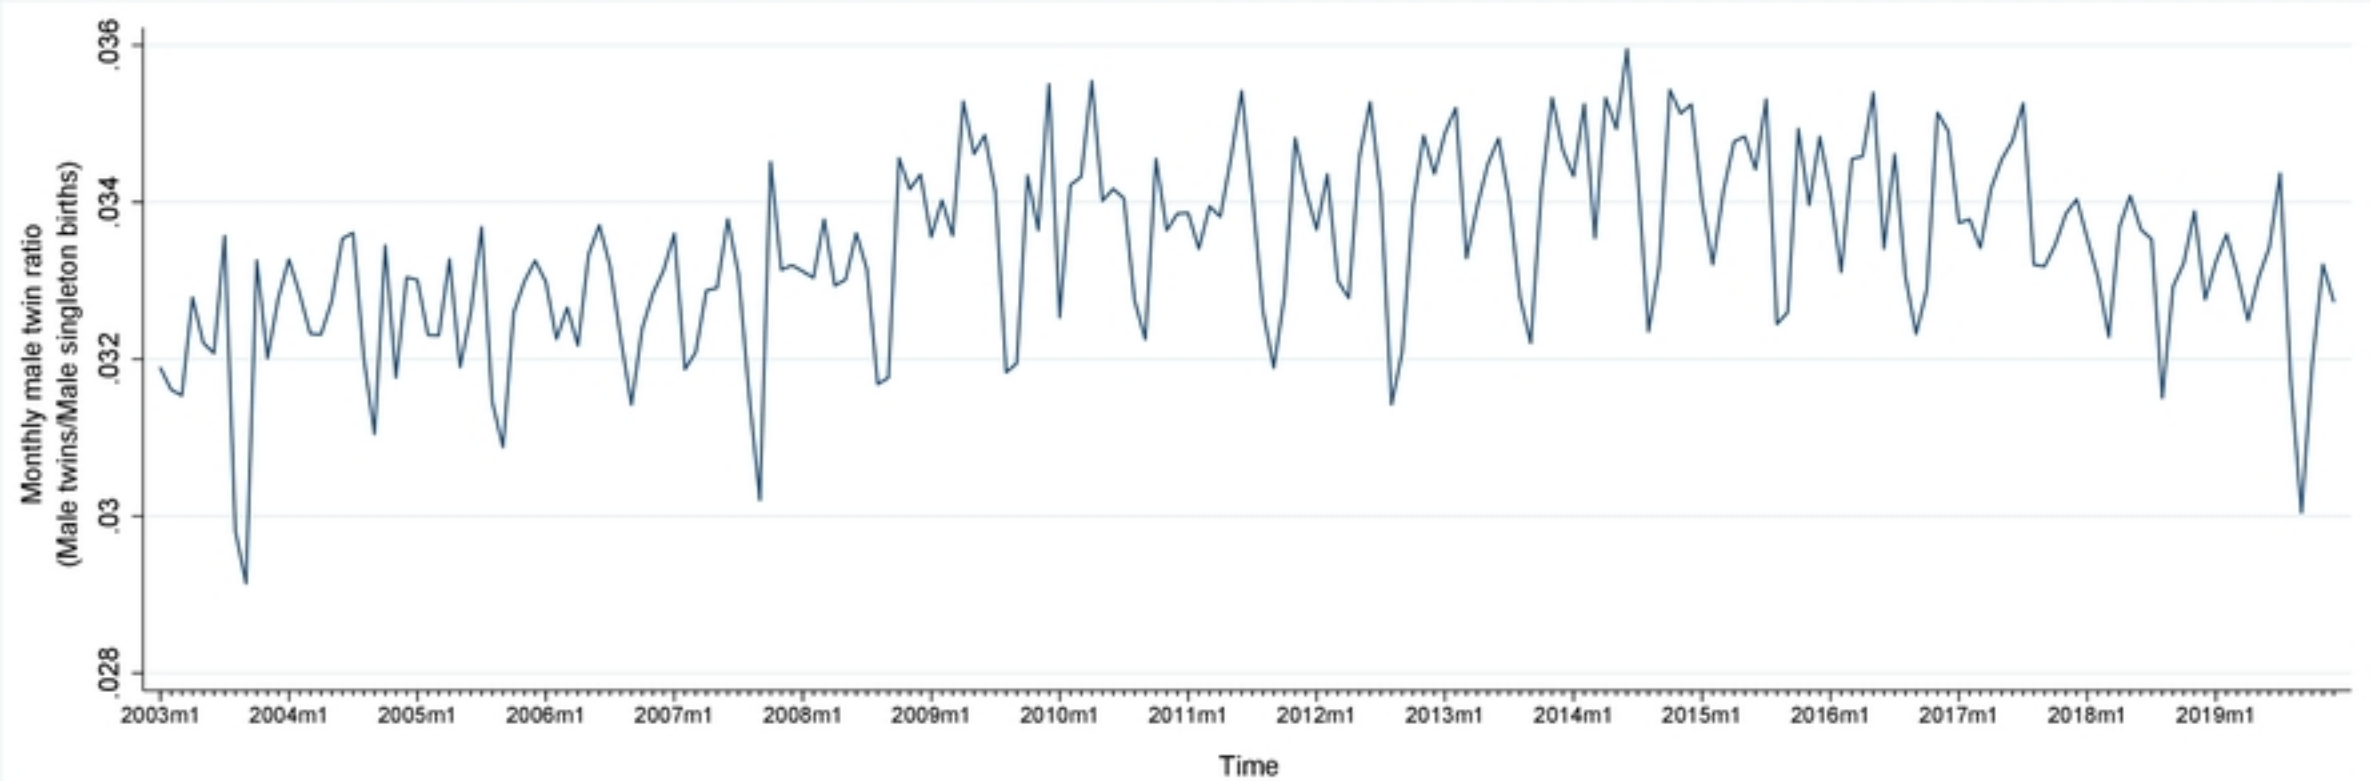

Figure 1

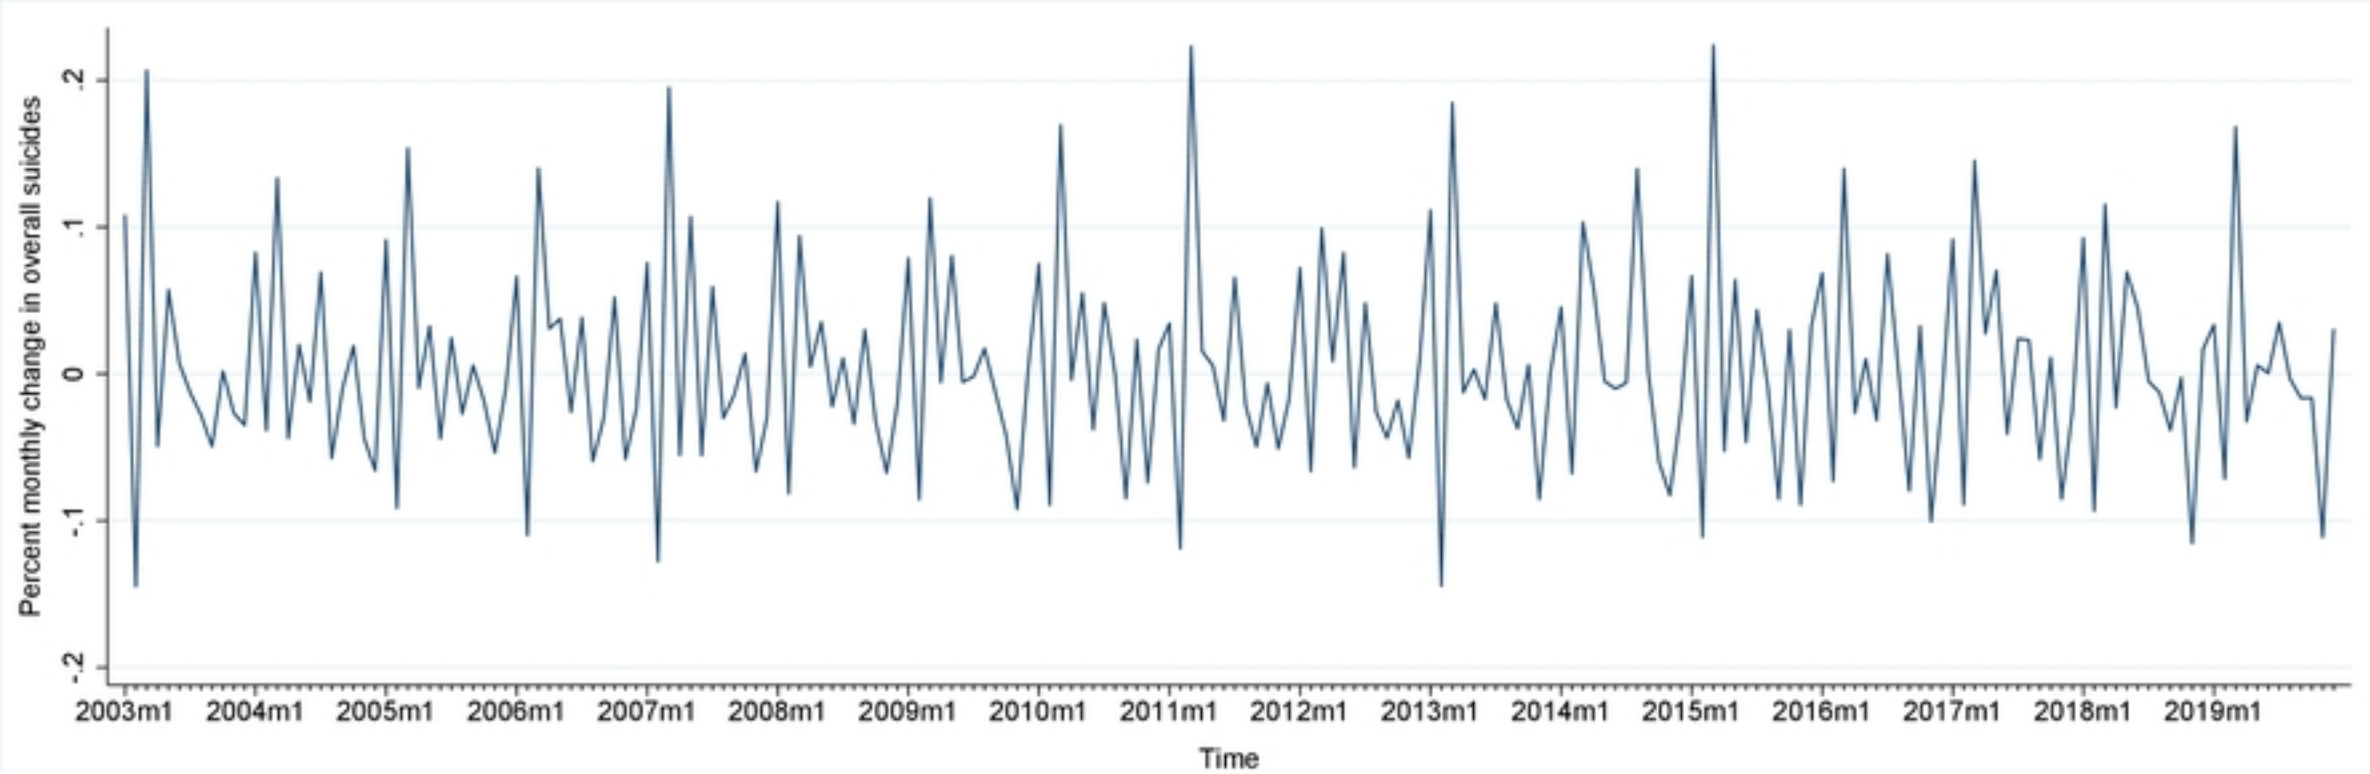

Figure 2

Figure 3a

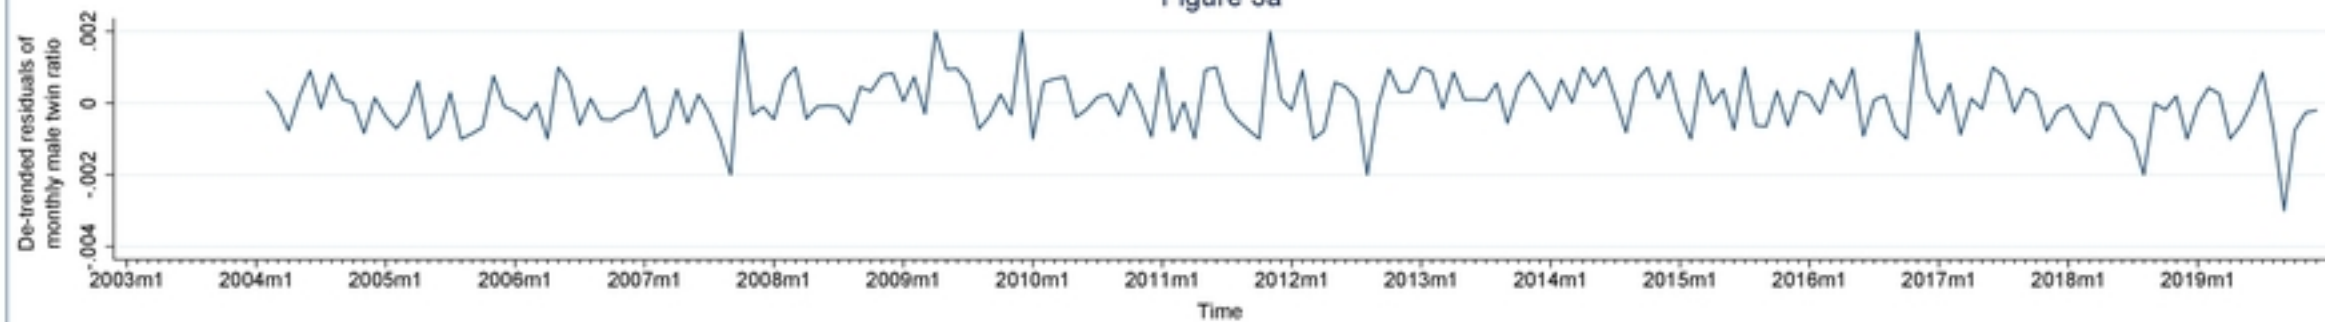

Figure 3b

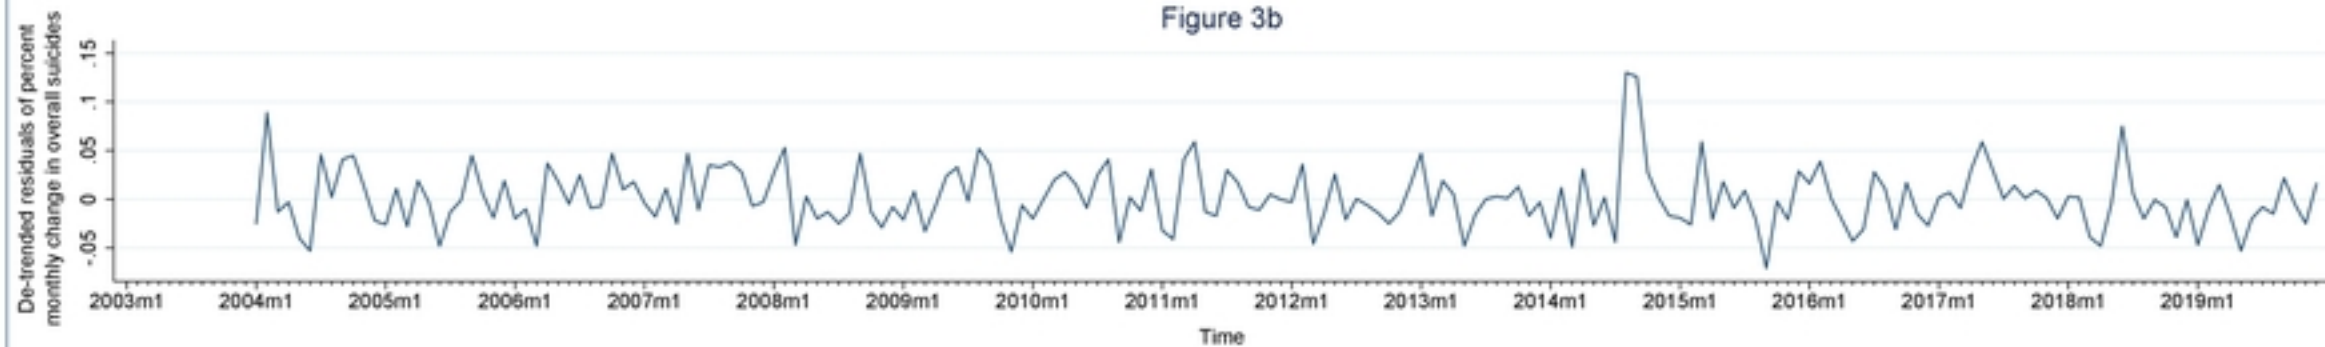

Figure 3
